# Supplementary material for: Obesity during pregnancy results in maternal intestinal inflammation, placental hypoxia, and alters fetal glucose metabolism at mid-gestation
Source: PubMed Central journal article supplement (PMC6879619; doi:10.1038/s41598-019-54098-x), 2019-11-26
Supplement: 41598_2019_54098_MOESM1_ESM.pdf [file 41598_2019_54098_MOESM1_ESM.pdf]

**Obesity during pregnancy results in maternal intestinal inflammation, placental hypoxia, and alters fetal glucose metabolism at mid-gestation**

Jessica G. Wallace<sup>1,7</sup>, Christian J. Bellissimo<sup>1,7</sup>, Erica Yeo<sup>1,7</sup>, Yu Fei Xia<sup>1,7</sup>, Jim J. Petrik<sup>5</sup>, Michael G. Surette<sup>1,2,7</sup>, Dawn M.E. Bowdish<sup>6</sup>, and Deborah M. Sloboda<sup>1,3,4,7\*</sup>

<sup>1</sup>Department of Biochemistry and Biomedical Sciences, McMaster University, Hamilton, Canada

<sup>2</sup>Department of Medicine, McMaster University, Hamilton, Canada

<sup>3</sup>Department of Obstetrics and Gynecology, McMaster University, Hamilton, Canada

<sup>4</sup>Department of Pediatrics, McMaster University, Hamilton, Canada

<sup>5</sup>Department of Biomedical Sciences, University of Guelph, Guelph, Canada

<sup>6</sup>Department of Pathology and Molecular Medicine, McMaster University, Hamilton, Canada

<sup>7</sup>Farncombe Family Digestive Health Research Institute, McMaster University, Hamilton, Canada

## Figures

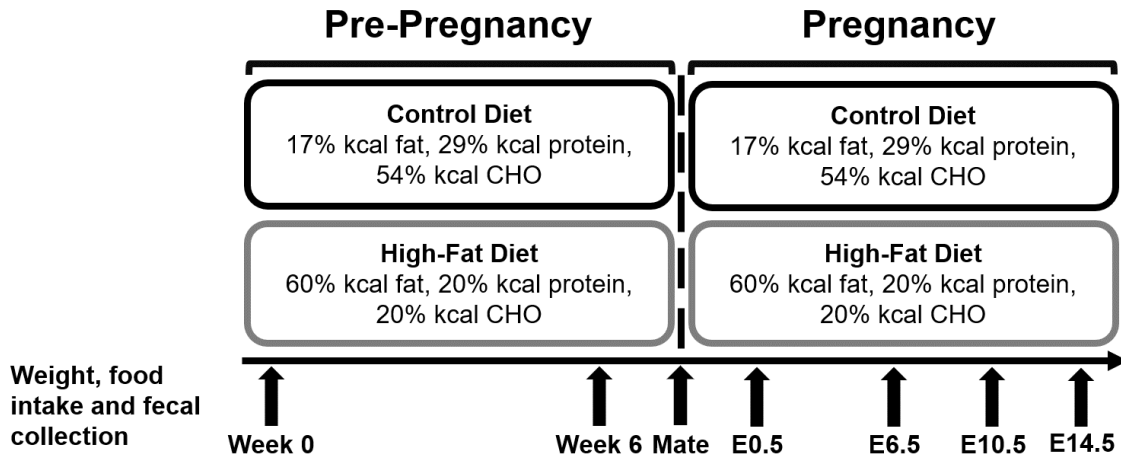

**Supplemental figure S1. Experimental design.** A schematic representation of the experimental animal design. C57BL/6 females were randomly assigned to 1 of 2 dietary groups: Control diet (17% kcal fat, 29% kcal protein, 54% kcal CHO, 3 kcal/g, n=10) or High fat diet (60% kcal fat, 20% kcal protein, 20% kcal CHO, 5.24 kcal/g, n=10) for 6 weeks and then mated with males. Fecal samples were collected from control females prior to dietary intervention (Week 0), after 6 weeks of dietary intervention (Week 6) and throughout gestation (E0.5, E6.5, E10.5 and E14.5, control n=7, high fat n=9). Abbreviations: CHO: Carbohydrate.

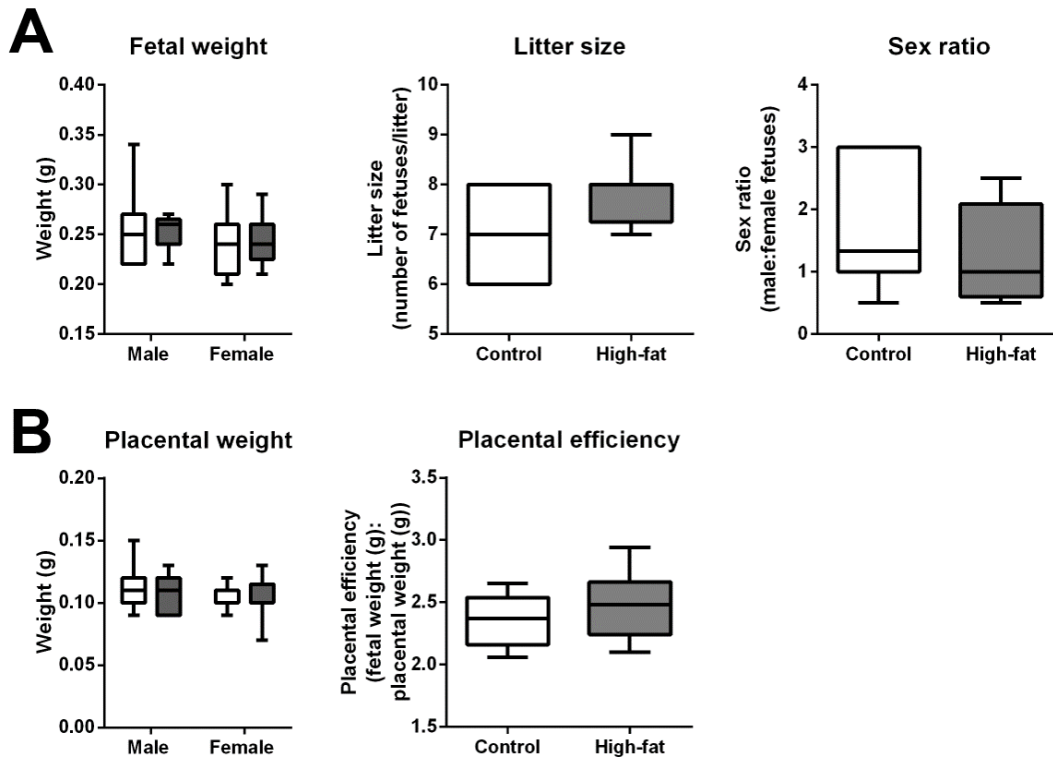

**Supplemental figure S2. Maternal obesity did not impact fetal or placental weight at E14.5.**

**A.** Fetal weight, litter size and sex ratio of control and high-fat exposed fetuses. **B.** Placental weight of control and high-fat exposed litters. Placental efficiency (feto-placental weight) of control and high-fat pregnancies. Data are presented as box and whisker plots, min to max, where the centre line represents the median. Data were analyzed using a Student's t-test. Control: open bar, n=7; high fat n= 9.

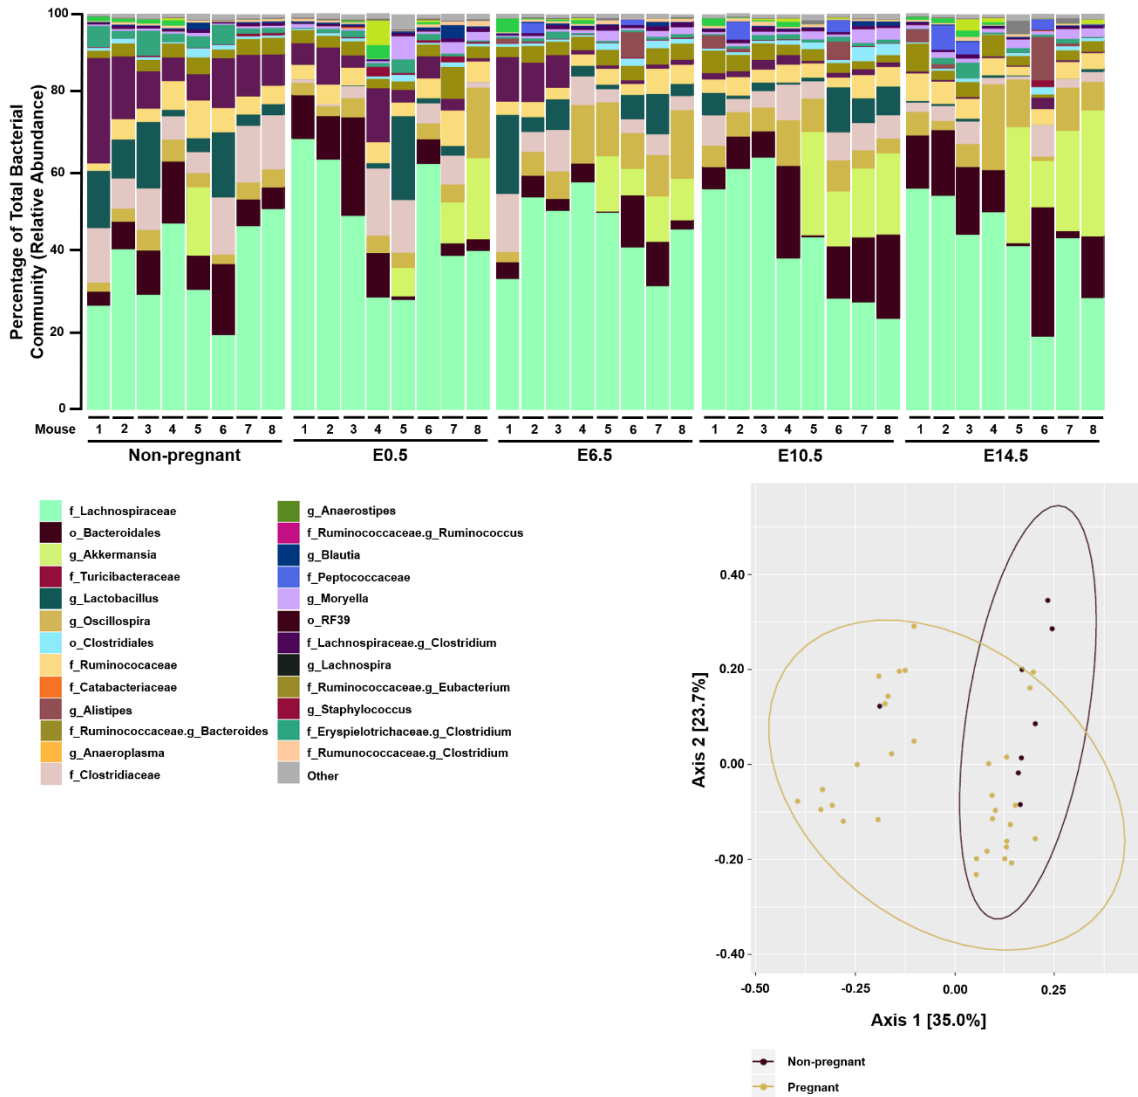

**Supplemental figure S3. The maternal intestinal microbiota in control pregnancy.**

**A.** Taxonomic summaries of microbial relative abundance resolved to the order (o), family (f), or genus (g) level classification within control fed females prior to pregnancy and at four time points during gestation; E0.5, E6.5, E10.5, and E14.5 (n=5). **B.** Principle Coordinate Analysis using the Bray-Curtis dissimilarity metric.

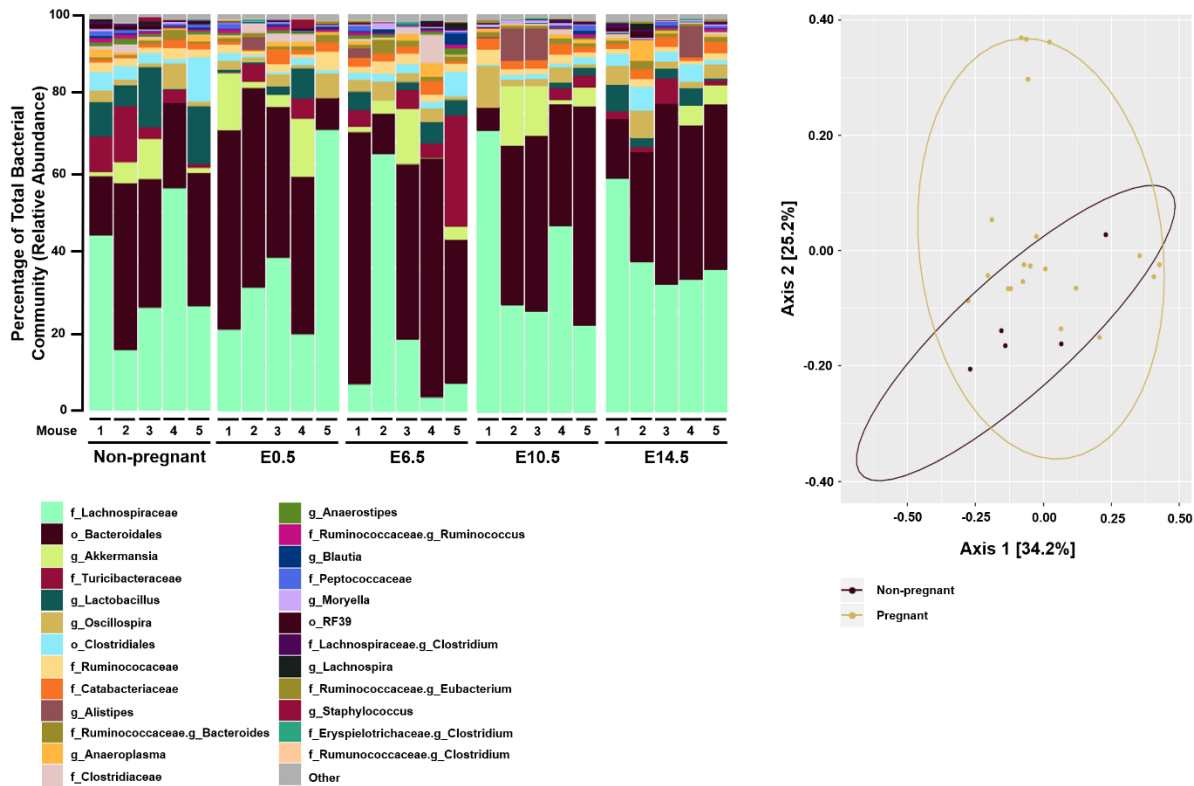

**Supplemental figure S4. The maternal intestinal microbiota is remodeled by maternal obesity. A.** Taxonomic summaries of microbial relative abundance resolved to the order (o), family (f), or genus (g) level classification within high-fat fed females prior to pregnancy and at four time points during gestation; E0.5, E6.5, E10.5, and E14.5 (n=8). We see a consistent mDIO impact on pregnancy related shifts in maternal intestinal microbiota **B.** Principle Coordinate Analysis using the Bray-Curtis dissimilarity metric. The effect of diet according to the PERMANOVA test was significant (p=0.001) and substantially large (R<sup>2</sup>=0.598).

## Tables

Supplemental Table S1

| Primary antibodies |                                     |                          |                  |          |
|--------------------|-------------------------------------|--------------------------|------------------|----------|
| Target peptide     | Antibody name                       | Supplier                 | Catalogue number | Dilution |
| <b>Intestine</b>   |                                     |                          |                  |          |
| CD3                | Anti-CD3 antibody [SP7]             | Abcam                    | ab16669          | 1:150    |
| <b>Placenta</b>    |                                     |                          |                  |          |
| F4/80              | Anti-F4/80 antibody [CI:A3-1]       | Abcam                    | ab6640           | 1:100    |
| CA IX              | Anti-Carbonic Anhydrase IX antibody | Abcam                    | ab15086          | 1:600    |
| VEGF               | VEGF antibody [A-20]                | Santa Cruz Biotechnology | sc-152           | 1:400    |
| CD31               | Anti-CD31 antibody [P2B1]           | Abcam                    | ab24590          | 1:200    |
| $\alpha$ SMA       | A-Actin antibody [1A4]              | Santa Cruz Biotechnology | sc-32251         | 1:400    |

## Supplemental Table S2

### Primer sequences

| Gene                                | Forward primer            | Reverse primer            | Amplicon length (bp) | GenBank Accession Number |
|-------------------------------------|---------------------------|---------------------------|----------------------|--------------------------|
| <b>Housekeeping</b>                 |                           |                           |                      |                          |
| <i>β-actin</i>                      | AGATCAAGATCATTGCTCC       | ACGCAGCTCAGTAACAGTC       | 174                  | NM_007393.5              |
| <i>Cyclophilin</i>                  | CTTCGAGCTGTTTGACAGACA     | TGGCGTGTAAAGTCACCAC       | 147                  | NM_008907.1              |
| <i>Hprt</i>                         | CAGTCCCAGCGTCGTGATT       | TCGAGCAAGTCTTTCAGTCC      | 142                  | NM_013556.2              |
| <i>β2m</i>                          | CTCGGTGACCCTGGTCTTTC      | TTGAGGGGTTTTCTGGATAGCA    | 71                   | NM_009735.3              |
| <i>Nono</i>                         | GCCAGAATGAAGGCTTGACTAT    | TATCAGGGGGAAGATTGCCCA     | 105                  | NM_001252518.1           |
| <b>Inflammation</b>                 |                           |                           |                      |                          |
| <i>Ffar2</i>                        | ACTTGCCCAAGGAGTTCTGG      | AGCTGTCTGCTCTTACCAC       | 59                   | NM_146187.4              |
| <i>Ffar3</i>                        | GTCCAATACTCTGCATCTGTGAC   | AGTCCCACGAGGAACACCAA      | 98                   | NM_001033316.2           |
| <i>Tlr2</i>                         | AAGGAGGTGCGGACTGTTT       | CCTCTGAGATTGACGCTT        | 156                  | NM_011905.3              |
| <i>Tlr4</i>                         | TCTGGGGAGGCACATCTTC       | TGCTCAGGATTCGAGGCTT       | 72                   | NM_021297.3              |
| <i>Traf6</i>                        | GCACGGAAACTTGGGTCTT       | CTCTGTTGTCAGTCGACTTG      | 105                  | NM_009424.3              |
| <i>Nfkb</i>                         | CTGCTCAGGTCCACTGCTTG      | TTGCGGAAGGATGTCTCCA       | 112                  | NM_008689.2              |
| <i>Tnf</i>                          | CAGACCTCACACTCAGACTA      | GGCTACAGGCTTGTCACTCG      | 86                   | NM_013693.3              |
| <i>Il6</i>                          | GGGACTGATGCTGGTGACA       | ACAGGTCTGTTGGGAGTGG       | 90                   | NM_001314054.1           |
| <i>Il10</i>                         | ACTTTAAGGGTTACTTGGGTTGC   | CCTGGGGCATCACTTCTACC      | 75                   | NM_010548.2              |
| <i>Cd3e</i>                         | CAGAAATGAAGTAATGAGCTGGCTG | CACTGTCTAGAGGGCACGTC      | 200                  | NM_007648.5              |
| <i>F4/80</i>                        | TTGTGGTCTTAACCTCAGTCTGC   | AGACACTCATCAACATCTGCG     | 141                  | NM_010130.4              |
| <i>Mcp1</i>                         | CCACAACCACCTCAAGCACT      | AGGCATCACAGTCCGAGTCA      | 75                   | NM_011333.3              |
| <i>Csf1</i>                         | TCTAGCCGAGATGTGGTGAC      | TATGCGAAGGGGAAGCTCAC      | 195                  | NM_007778.4              |
| <i>Csf1r</i>                        | AAGTGTCTTAGAGGTGGTTTCC    | GAAAGGGAACAGAGGAAGAGGC    | 104                  | NM_001037859.2           |
| <i>Csf2r</i>                        | GAGTGACGTGCAGGAGGTTTC     | GAGGTCTTCTGAGGGTCT        | 116                  | NM_009970.2              |
| <i>Arg1</i>                         | ACAAGACAGGGCTCCTTTCAG     | GGCTTATGTTACCTCCCG        | 148                  | NM_007482.3              |
| <i>Nos2</i>                         | GGTGAAGGGACTGAGCTGTT      | ACGTTCTCCGTTCTCTTGACAG    | 103                  | NM_010927.4              |
| <b>Barrier function</b>             |                           |                           |                      |                          |
| <i>Muc1</i>                         | CAAGTTCAGGTGAGTCCG        | TGACTTACAGTCAGAGGCAC      | 74                   | NM_013605.2              |
| <i>Muc4</i>                         | AGATGGCTCTGAACCTAAGTATGC  | AGGTGGTAGCCTTTGTAGCC      | 67                   | NM_080457.3              |
| <i>Muc2</i>                         | GAAGCCAGATCCCGAAACCA      | GAATCGGTAGACATCGCCGT      | 81                   | NM_023566.3              |
| <i>Muc5ac</i>                       | CTGCCTGTACAATGGGACACT     | AACATGTGTTGGTGCAGTCAGT    | 68                   | NM_010844.1              |
| <i>Cldn</i>                         | TCTACGAGGGACTGTGGATG      | TCAGATTAGCAAGGAGTCG       | 84                   | NM_016674.4              |
| <i>Ocln</i>                         | AGTTGAACTGTGGATTGGCAG     | TAAGCGAACCTTGGCGGC        | 87                   | NM_008756.2              |
| <i>Zo-1</i>                         | GAGAGACAAGATGCCGCCA       | CCATTGCTGTGCTCTTAGCG      | 50                   | NM_009386.2              |
| <b>Placental nutrient transport</b> |                           |                           |                      |                          |
| <i>Slc2a1</i>                       | GGCTTGCTGTAGAGTGACG       | TGTAGAACTCCTCAATAACCTTCTG | 275                  | NM_011400.3              |
| <i>Slc2a3</i>                       | AATAGGTAGGCTGGGCTTCG      | AGAGATGGGGTACACCTTCGTT    | 184                  | NM_011401.4              |
| <i>Slc38a2</i>                      | GCAGTGAATCCTTGGGCTT       | TAAAGATCCTCCTTCGTTGGCAG   | 140                  | NM_175121.3              |
| <i>Fabp4</i>                        | AAGCTGGTGGTGAATGTGTTA     | CCTCTTCTTTGGCTCATGC       | 77                   | NM_024406.2              |
| <b>Gluconeogenesis</b>              |                           |                           |                      |                          |
| <i>Pgc1a</i>                        | TTGACTGGCGTCATTCCGGG      | AGAGCAGCACACTCTATGTCAC    | 84                   | NM_008904.2              |
| <i>Pc</i>                           | AGGGCGGAGCTAACATCTACC     | CCCCTCGAAGCTGTTGGAACT     | 74                   | NM_001162946.1           |
| <i>G6p</i>                          | TATTGTTGGTGTGCCCTTG       | AGTCCAATACATGAGGCTGGC     | 121                  | NM_175935.3              |
| <i>Pepck</i>                        | CTGAAGGTGTCCCCTTGTGTC     | CATCTTGCCCTTGTGTTCTGC     | 110                  | NM_00110 44.2            |
| <i>Hnf4a</i>                        | GGTAGGGGAGAATGCGACTC      | TCAGATGGGGACGTGTCATTG     | 142                  | NM_008261.3              |
| <i>Nr1h3</i>                        | CGACAGTTTTGGTAGAGGGAC     | TGCAGAATCAGGAGAAACATCAG   | 106                  | NM_001177730.1           |
| <i>Nr1h2</i>                        | CGCCACGTCAACCACTATTA      | TCCTCTGGCTCCACGATGTA      | 96                   | NM_001285518.1           |
